# Supplementary material for: Pool testing on random and natural clusters of individuals: Optimisation of SARS-CoV-2 surveillance in the presence of low viral load samples
Source: PubMed Central journal article supplement (PMC8130965; doi:10.1371/journal.pone.0251589), 2021-05-18
Supplement: pone.0251589.s002.pdf [file pone.0251589.s002.pdf]

**S1 Table.** Pool testing on random groups: Monte Carlo means (90% variability intervals) of the number of false negatives, by prevalence ( $p$ ) and group size ( $k$ ). Population size = 10000; Specificity of pool testing = 0.997; Sensitivity of pool testing = 0.995.

| $k$ | MC mean of the number of false negatives |                   |                   |                   |                   |                    |
|-----|------------------------------------------|-------------------|-------------------|-------------------|-------------------|--------------------|
|     | $p=0.003$                                | $p=0.005$         | $p=0.01$          | $p=0.03$          | $p=0.05$          | $p=0.1$            |
| 2   | 0.2<br>(0.0; 1.0)                        | 0.3<br>(0.0; 1.0) | 0.6<br>(0.0; 2.0) | 1.6<br>(0.0; 4.0) | 2.4<br>(0.0; 5.0) | 4.9<br>(2.0; 0.9)  |
| 3   | 0.2<br>(0.0; 1.0)                        | 0.3<br>(0.0; 1.0) | 0.6<br>(0.0; 2.0) | 1.5<br>(0.0; 4.0) | 2.4<br>(0.0; 5.0) | 4.9<br>(1.0; 0.9)  |
| 4   | 0.2<br>(0.0; 1.0)                        | 0.3<br>(0.0; 1.0) | 0.6<br>(0.0; 2.0) | 1.6<br>(0.0; 4.0) | 2.5<br>(0.0; 5.0) | 4.9<br>(2.0; 0.9)  |
| 5   | 0.2<br>(0.0; 1.0)                        | 0.3<br>(0.0; 1.0) | 0.6<br>(0.0; 2.0) | 1.6<br>(0.0; 4.0) | 2.5<br>(0.0; 5.0) | 5.0<br>(2.0; 0.9)  |
| 10  | 0.2<br>(0.0; 1.0)                        | 0.3<br>(0.0; 1.0) | 0.6<br>(0.0; 2.0) | 1.5<br>(0.0; 4.0) | 2.5<br>(0.0; 6.0) | 5.0<br>(1.0; 10.0) |
